# Supplementary material for: Neutrophils in chronic lymphocytic leukemia are permanently activated and have functional defects
Source: PubMed Central journal article supplement (PMC5689581; doi:10.18632/oncotarget.20031), 2017-08-08
Supplement: oncotarget-08-84889-s001.pdf [file oncotarget-08-84889-s001.pdf]

## Neutrophils in chronic lymphocytic leukemia are permanently activated and have functional defects

### SUPPLEMENTARY MATERIALS

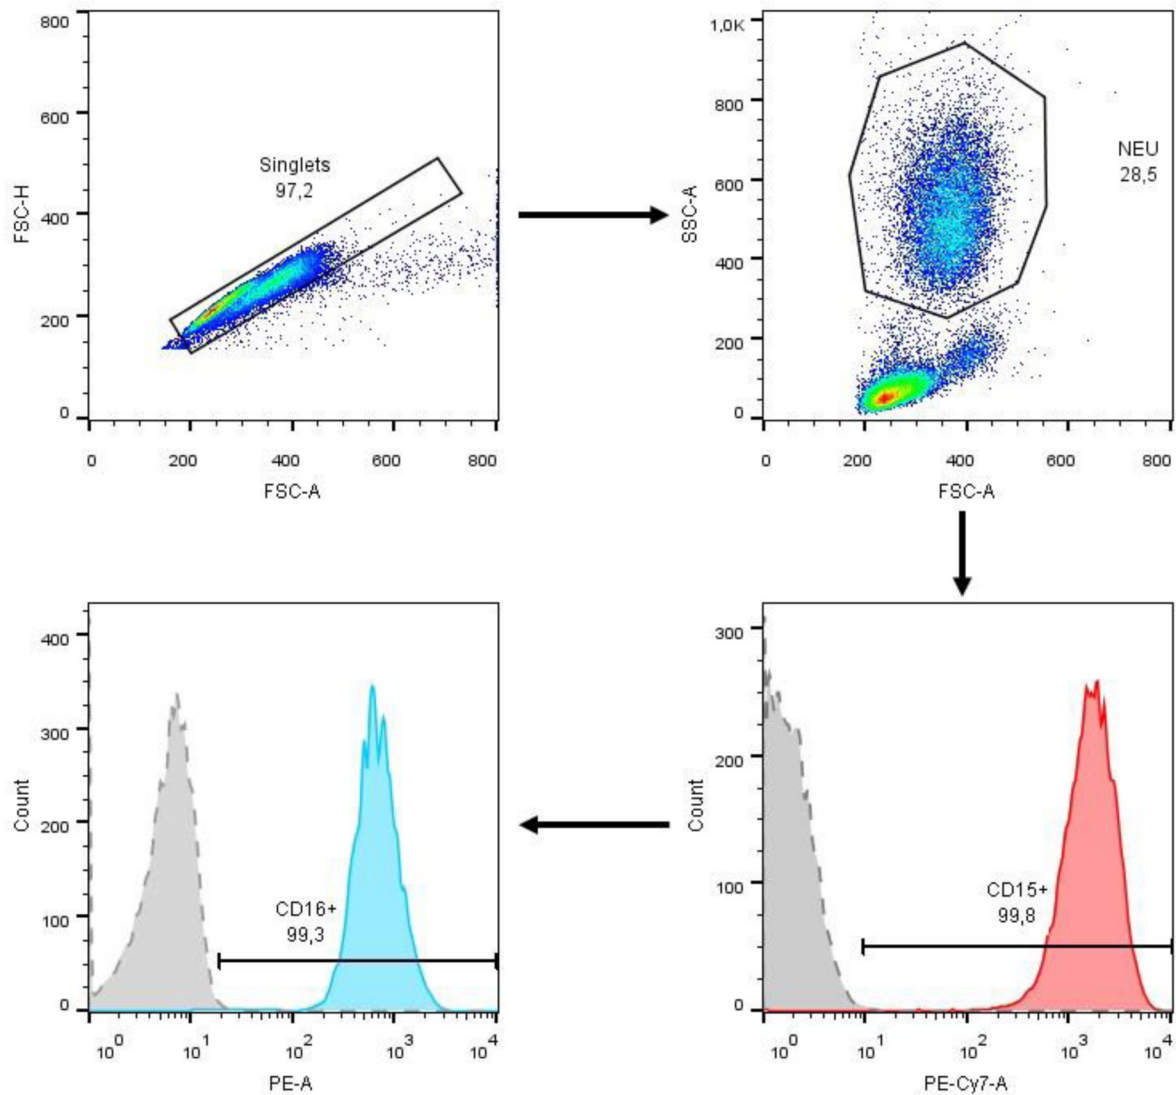

**Supplementary Figure 1: Gating strategy for neutrophils.** Cell doublets were excluded by displaying the forward scatter (FSC) height values vs FSC area values. Population of neutrophils was identified based on FSC and side scatter (SSC) properties and bright fluorescence signal of conjugated anti-CD15 and anti-CD16 antibodies. Isotype matched irrelevant antibodies were for elimination of negative signals (displayed with grey peaks). Numbers in figures indicate the percentage of gated cell populations (% of singlets, % of neutrophils and % of CD15+ CD16+ neutrophils, respectively).

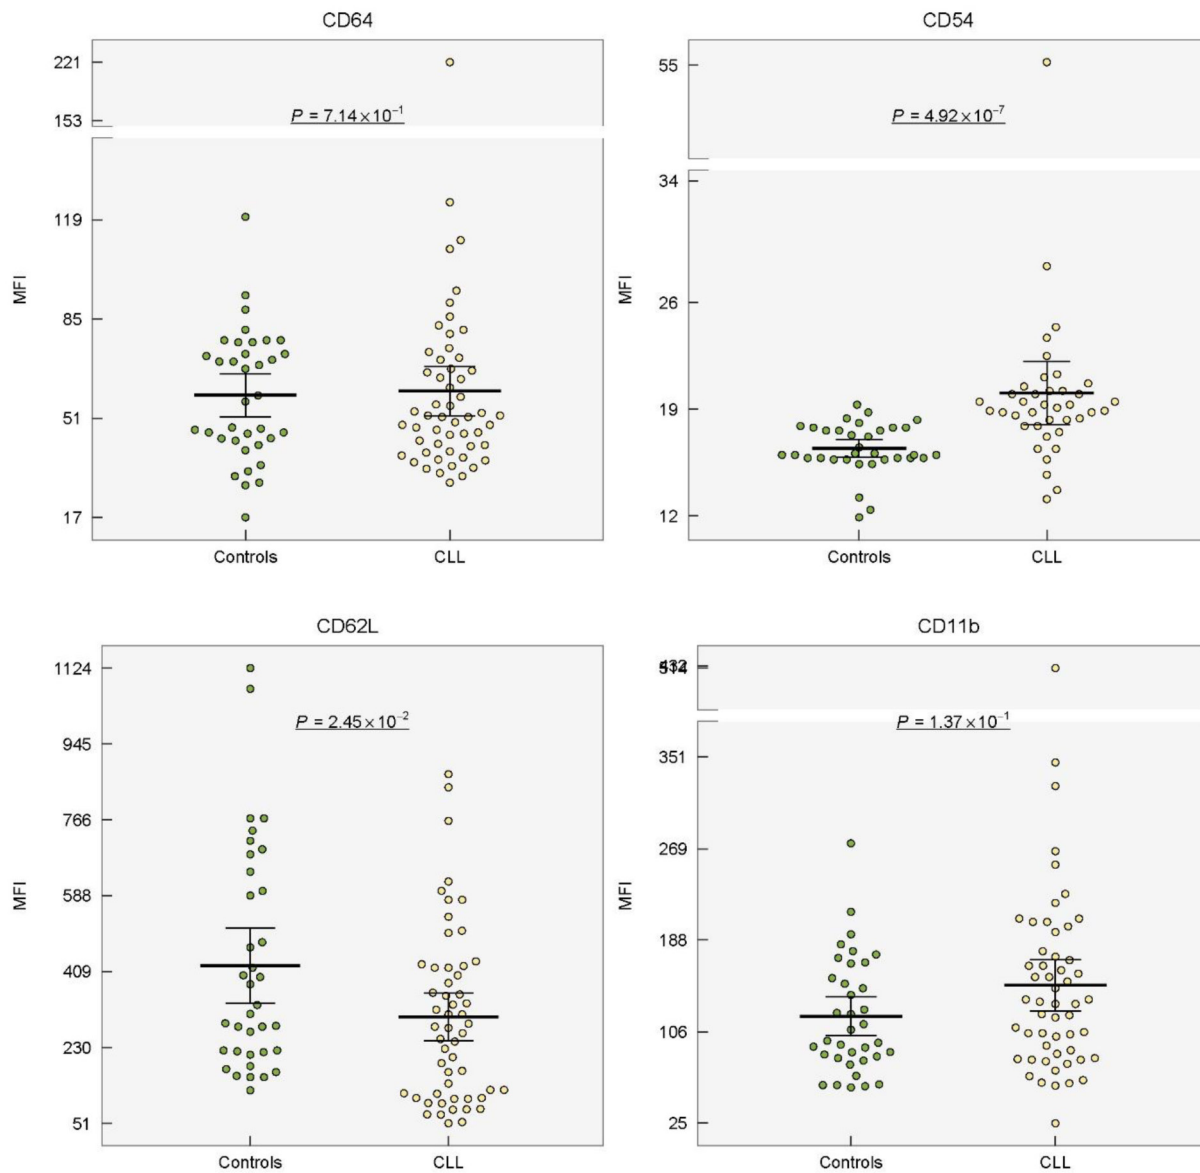

**Supplementary Figure 2: Distribution of median expression intensities (MFI) of surface markers (CD64, CD54, CD62L, CD11b) on circulating neutrophils from patients with CLL and healthy controls.** Group means are indicated by horizontal bars, error bars indicate 95%CI; *P* values for differences between two groups are stated.

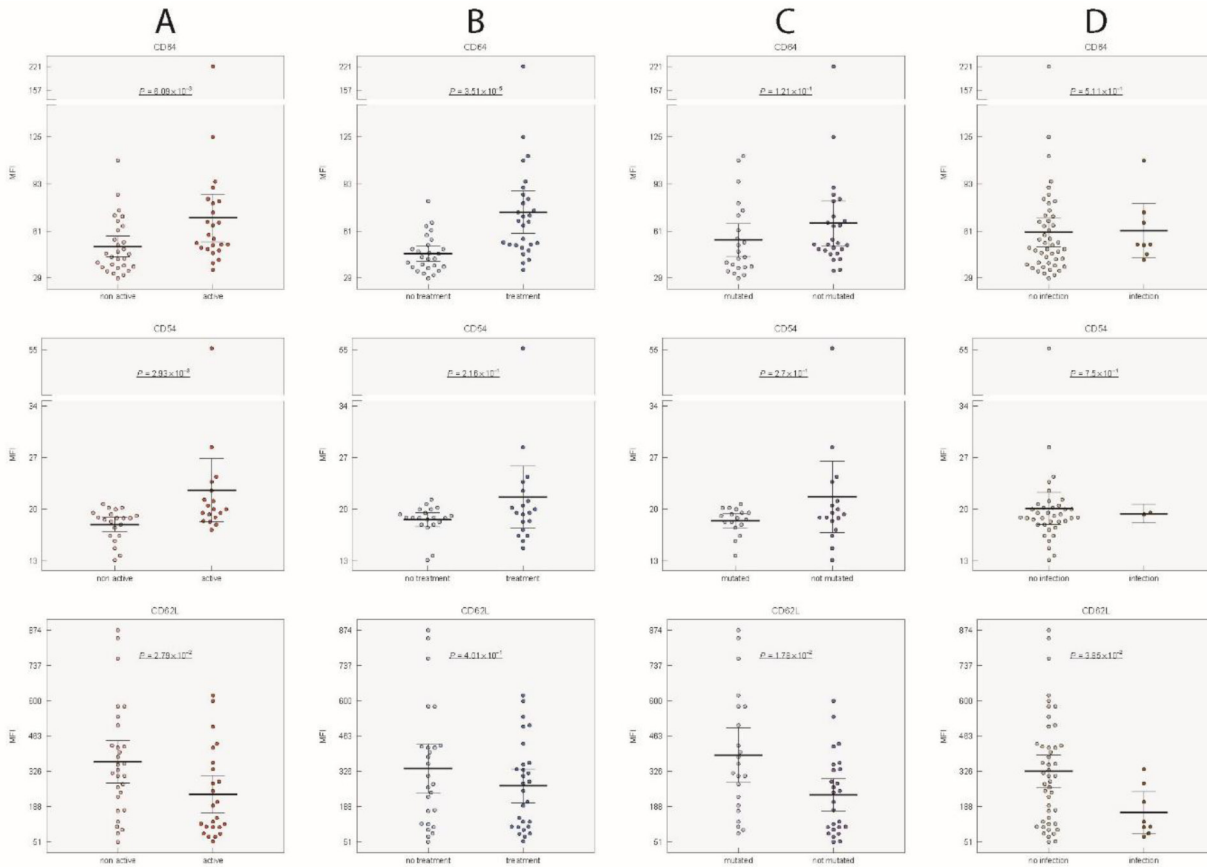

**Supplementary Figure 3: Distribution of surface markers (CD64, CD54, CD62L) median expression intensities (MFI) on neutrophils in CLL subgroups: A) non-active vs active disease, B) untreated vs treated disease, C) mutated vs unmutated *IGHV* gene status, D) CLL patients without infection vs with ongoing infection. Group means are indicated by horizontal bars, error bars indicate 95%CI; *P* values for differences between two groups are stated.**

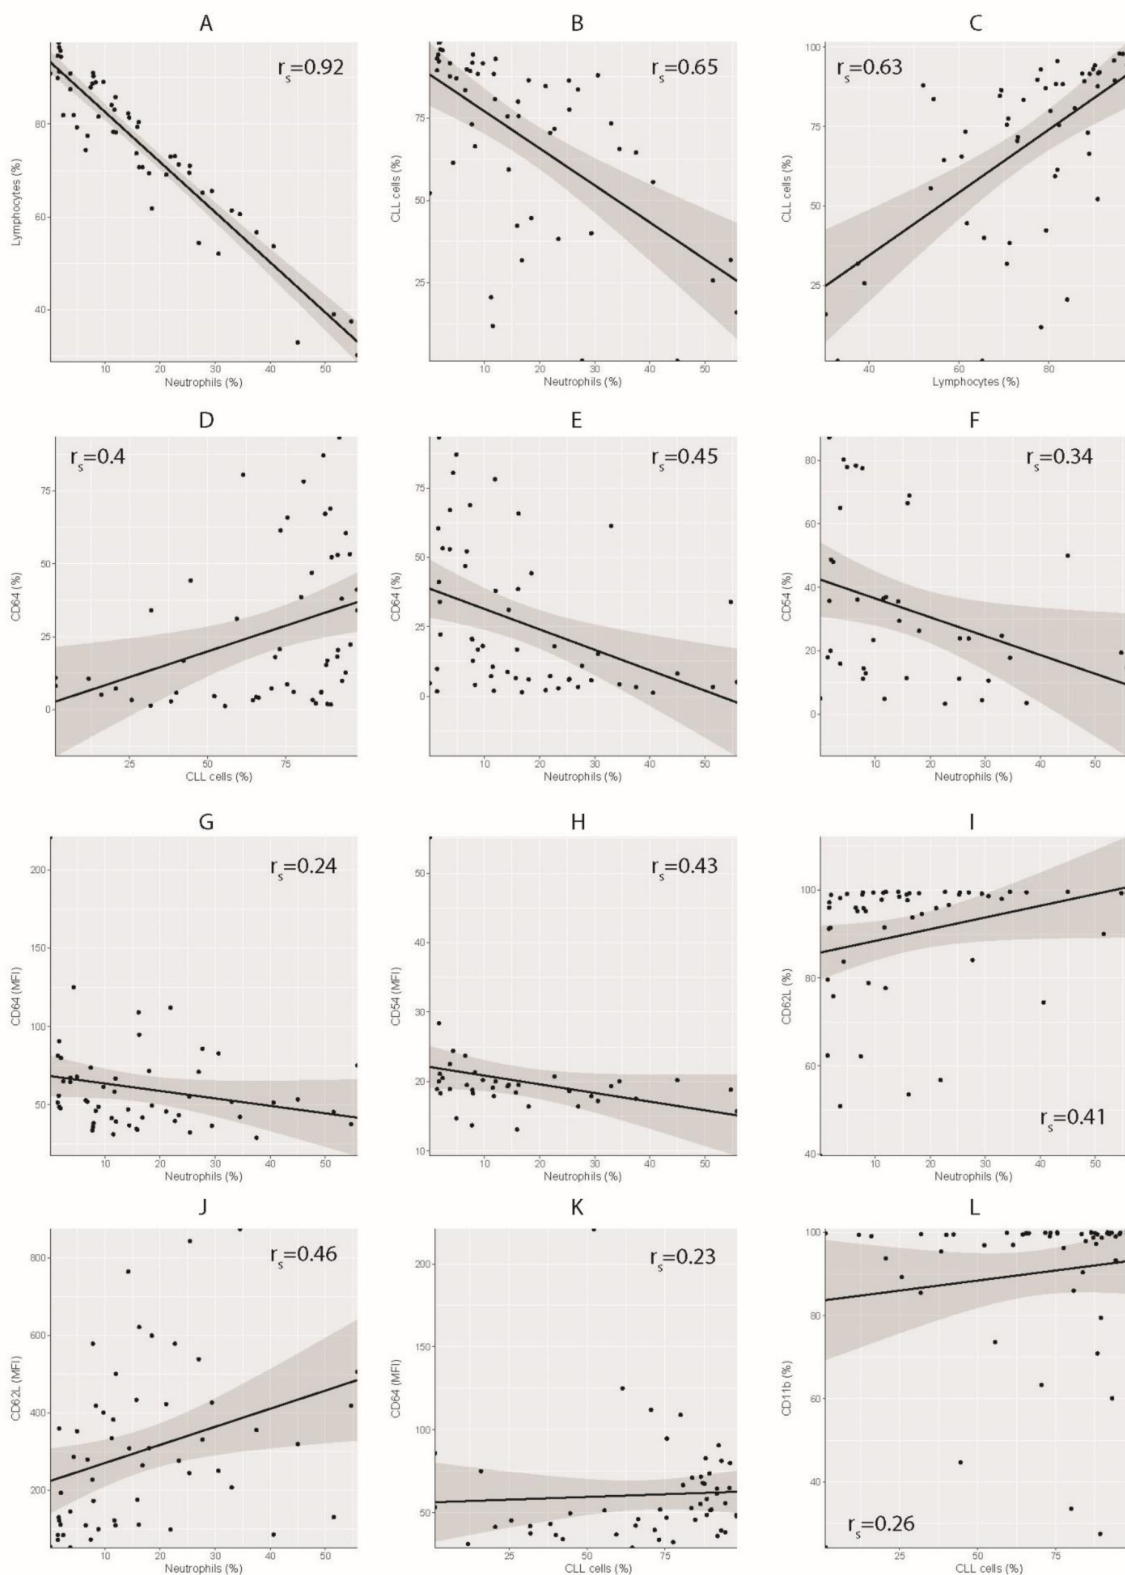

**Supplementary Figure 4: Association between surface markers and percentage of circulating neutrophils, lymphocytes and CLL cells in patients with CLL: A)** lymphocytes (%) vs neutrophils (%), **B)** CLL cells (%) vs neutrophils (%), **C)** CLL cells (%) vs lymphocytes (%), **D)** CD64 (%) vs CLL cells (%), **E)** CD64 (%) vs neutrophils (%), **F)** CD54 (%) vs neutrophils (%), **G)** CD64 (MFI) vs neutrophils (%), **H)** CD54 (MFI) vs neutrophils (%), **I)** CD62L (%) vs neutrophils (%), **J)** CD62L (MFI) vs neutrophils (%), **K)** CD64 (MFI) vs CLL cells (%), **L)** CD11b (%) vs CLL cells (%).

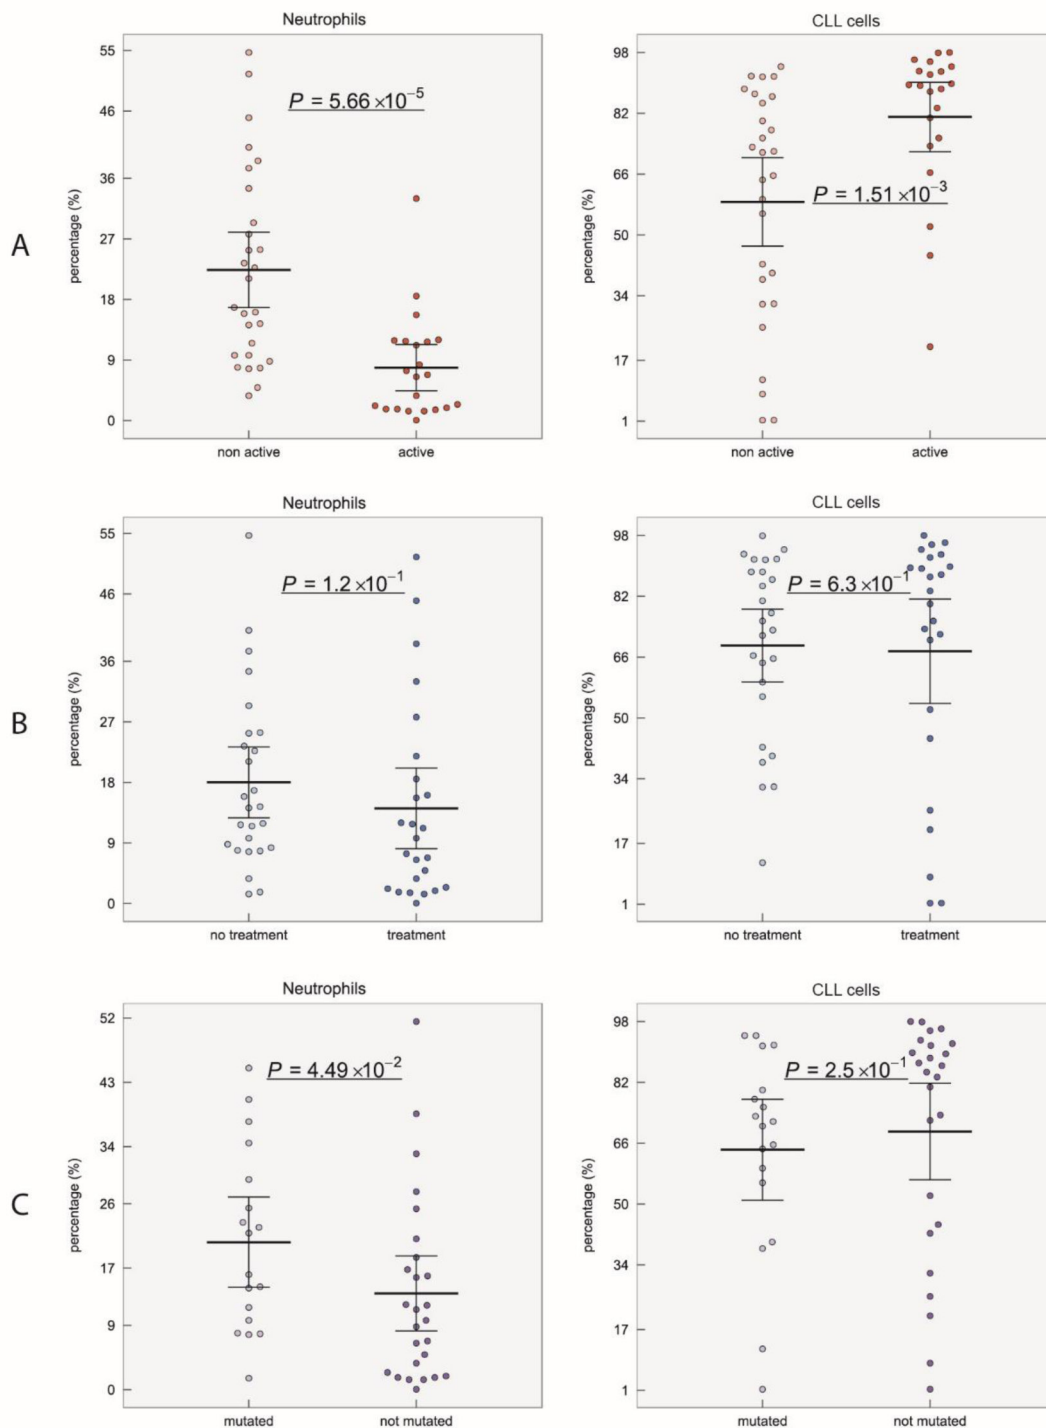

**Supplementary Figure 5:** Distribution of percentages of circulating neutrophils and CLL cells in **A)** non-active vs active disease, **B)** untreated vs treated disease, **C)** mutated vs unmutated *IGHV* gene status. Group means are indicated by horizontal bars, error bars indicate 95%CI; *P* values for differences between two groups are stated.

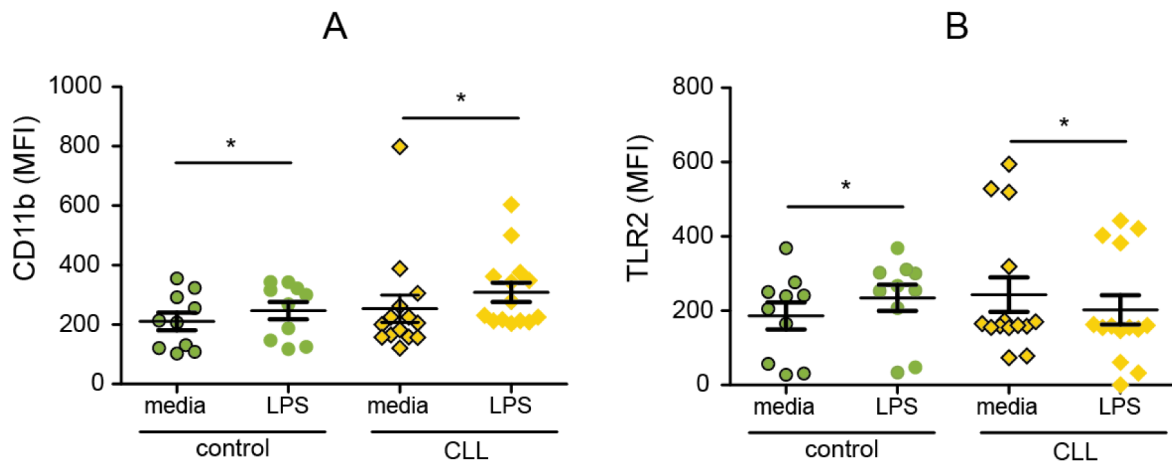

**Supplementary Figure 6: Influence of LPS exposure on CD11b and TLR2 expression on neutrophils from CLL.** The cell surface expression of CD11b and TLR2 was measured on neutrophils from CLL patients (CLL, n=14) and healthy controls (control, n=10) after LPS exposure. The data are presented as median fluorescence intensity (MFI) and reported as means  $\pm$  SEM (\* $P$ <0.05).

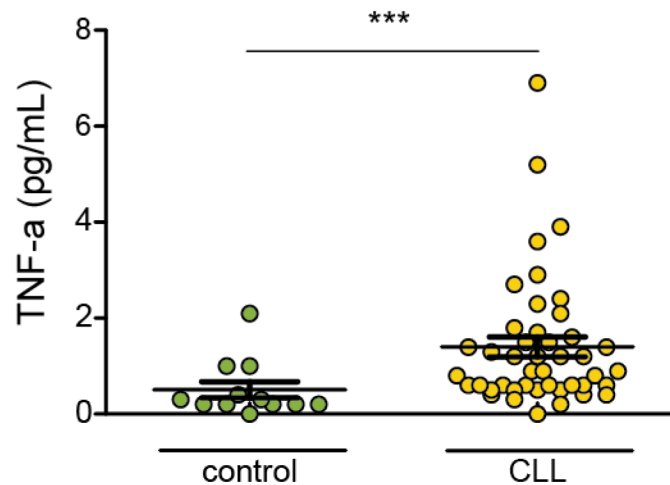

**Supplementary Figure 7: Serum TNF-a levels in CLL patients.** The TNF-a levels were investigated in serum from CLL patients (CLL, n=44) and healthy control subjects (control, n=12) and reported as means  $\pm$  SEM (\*\*\*) $P$ <0.001).

**Supplementary Table 1: Relative and absolute neutrophil counts and expression levels of surface markers on neutrophils in: A) Healthy controls vs untreated CLL, B) Healthy controls vs treated CLL**

| <i>Marker</i>                  | <i>Mean (95% CI)</i>           |                             | <i>FC<sup>#</sup></i> | <i>P</i>               |
|--------------------------------|--------------------------------|-----------------------------|-----------------------|------------------------|
| <b>A</b>                       | <b><i>Healthy controls</i></b> | <b><i>CLL untreated</i></b> |                       |                        |
| CD64 (%)                       | 6.89 (3.73-10.0)               | 16.5 (9.12-23.9)            | 2.96                  | $2.43 \times 10^{-3}$  |
| CD54 (%)*                      | 16.2 (11.5-20.9)               | 23.3 (14.0-32.5)            | 1.43                  | 0.20                   |
| CD62L (%)                      | 98.3 (97.3-99.3)               | 93.0 (88.3-97.6)            | 0.91                  | $5.92 \times 10^{-3}$  |
| CD11b (%)                      | 96.5 (93.8-99.3)               | 94.6 (90.3-98.9)            | 0.99                  | 0.48                   |
| CD64 (MFI)                     | 58.8 (51.4-66.3)               | 45.6 (40.5-50.8)            | 0.74                  | 0.01                   |
| CD54 (MFI)*                    | 16.4 (15.9-17.0)               | 18.6 (17.6-19.5)            | 1.17                  | $1.68 \times 10^{-5}$  |
| CD62L (MFI)                    | 423 (334-512)                  | 338 (243-433)               | 0.91                  | 0.20                   |
| CD11b (MFI)                    | 120 (103-138)                  | 156 (118-193)               | 1.36                  | 0.08                   |
| Neutrophils (%)                | 58.4 (56.2-60.7)               | 18.0 (12.7-23.3)            | 0.25                  | $4.4 \times 10^{-11}$  |
| Lymphocytes (%)                | 28.8 (26.9-30.8)               | 76.6 (71.0-82.2)            | 2.78                  | $2.38 \times 10^{-11}$ |
| ANC ( $\times 10^9/L$ )        | 4.82 (4.09-5.55)               | 5.01 (4.14-5.87)            | 0.86                  | 0.89                   |
| CD64+ ANC ( $\times 10^9/L$ )  | 0.40 (0.08-0.71)               | 0.94 (0.29-1.59)            | 2.24                  | 0.02                   |
| CD54+ ANC ( $\times 10^9/L$ )  | 0.59 (0.33-0.85)               | 1.09 (0.54-1.64)            | 2.07                  | 0.06                   |
| CD62L+ ANC ( $\times 10^9/L$ ) | 4.79 (4.07-5.51)               | 4.56 (3.82-5.31)            | 0.78                  | 0.44                   |
| CD11b+ ANC ( $\times 10^9/L$ ) | 4.81 (4.08-5.54)               | 4.76 (3.90-5.62)            | 0.79                  | 0.61                   |
| <b>B</b>                       | <b><i>Healthy controls</i></b> | <b><i>CLL treated</i></b>   |                       |                        |
| CD64 (%)                       | 6.89 (3.73-10.0)               | 35.5 (24.1-46.9)            | 10.42                 | $4.13 \times 10^{-7}$  |
| CD54 (%)*                      | 16.2 (11.5-20.9)               | 42.8 (29.9-55.8)            | 2.96                  | $2.49 \times 10^{-4}$  |
| CD62L (%)                      | 98.3 (97.3-99.3)               | 87.8 (81.2-94.4)            | 0.96                  | $4.27 \times 10^{-5}$  |
| CD11b (%)                      | 96.5 (93.8-99.3)               | 86.6 (77.3-95.9)            | 0.92                  | 0.02                   |
| CD64 (MFI)                     | 58.8 (51.4-66.3)               | 73.8 (59.5-88.1)            | 1.17                  | 0.08                   |
| CD54 (MFI)*                    | 16.4 (15.9-17.0)               | 21.7 (17.4-25.9)            | 1.21                  | $7.08 \times 10^{-5}$  |
| CD62L (MFI)                    | 423 (334-512)                  | 269 (203-336)               | 0.83                  | 0.01                   |
| CD11b (MFI)                    | 120 (103-138)                  | 140 (111-170)               | 1.11                  | 0.45                   |
| Neutrophils (%)                | 58.4 (56.2-60.7)               | 15.9 (9.81-22.0)            | 0.20                  | $3.66 \times 10^{-11}$ |
| Lymphocytes (%)                | 28.8 (26.9-30.8)               | 73.8 (66.6-81.0)            | 2.69                  | $6.23 \times 10^{-11}$ |
| ANC ( $\times 10^9/L$ )        | 4.82 (4.09-5.55)               | 3.42 (2.76-4.09)            | 0.60                  | $5.94 \times 10^{-3}$  |
| CD64+ ANC ( $\times 10^9/L$ )  | 0.40 (0.08-0.71)               | 1.18 (0.73-1.63)            | 5.27                  | $5.94 \times 10^{-3}$  |
| CD54+ ANC ( $\times 10^9/L$ )  | 0.59 (0.33-0.85)               | 1.41 (0.94-1.89)            | 3.77                  | $1.93 \times 10^{-3}$  |
| CD62L+ ANC ( $\times 10^9/L$ ) | 4.79 (4.07-5.51)               | 3.13 (2.44-3.82)            | 0.51                  | $1.56 \times 10^{-3}$  |
| CD11b+ ANC ( $\times 10^9/L$ ) | 4.81 (4.08-5.54)               | 3.05 (2.31-3.78)            | 0.50                  | $2.04 \times 10^{-3}$  |

Legend: ANC: Absolute neutrophil count. The normal range for the ANC = 1.5 to  $8.0 \times 10^9/L$ .

<sup>#</sup>FC (Fold Change) between group medians

\*CD54 available in 39 patients and 34 controls

**Supplementary Table 2: Type and line of treatment in CLL patients with treatment history**

| <b>Patient</b> | <b>Type and line of treatment</b>                                                                                 | <b>last treatment before sampling</b> |
|----------------|-------------------------------------------------------------------------------------------------------------------|---------------------------------------|
| P1             | RCD/FCR (1st line)                                                                                                | 24 months                             |
| P2             | FCR (1st line), FCR (2nd line)                                                                                    | 36 months                             |
| P3             | RCD (1st line)                                                                                                    | 24 months                             |
| P4             | FCR (1st line)                                                                                                    | 63 months                             |
| P5             | RCD (1st line)                                                                                                    | 4 months                              |
| P6             | FCR (1st line), FCR (2nd line), R-bendamustine (3rd line)                                                         | 27 months                             |
| P7             | FCR (1st line)                                                                                                    | 12 months                             |
| P8             | FCR (1st line), CHOP (2nd line), CFA + ETO + dexamethasone (3rd line)                                             | 60 months                             |
| P9             | FCR (1st line)                                                                                                    | 20 months                             |
| P10            | FCR (1st line)                                                                                                    | 53 months                             |
| P11            | FCR, R-dexamethasone, CFA (1st line)                                                                              | 38 months                             |
| P12            | FCR Q-lite (1st line), alemtuzumab (2nd line)                                                                     | 7 months                              |
| P13            | COP (1st line), FCR (2nd line), RCD (3th line), R-bendamustine (4th line), alemtuzumab (5th line), RCD (6th line) | 2 months                              |
| P14            | FCR (1st line)                                                                                                    | 25 months                             |
| P15            | RCD (1st line)                                                                                                    | 8 months                              |
| P16            | FCR (1st line)                                                                                                    | 17 months                             |
| P17            | R-CHOP (1st line), FCR (2nd line), RCD + R-bendamustine (3th line)                                                | 1 month                               |
| P18            | R-bendamustine (1st line), FCR Q-lite (2nd/3th lines), FCR (3th line)                                             | 7 months                              |
| P19            | FCR (1st line), R-bendamustine (2nd line)                                                                         | 7 months                              |
| P20            | chlorambucil, CFA + prednisone (1st line)                                                                         | 1 month                               |
| P21            | R-bendamustine (1st line), FCR Q-lite (2nd line)                                                                  | 7 months                              |
| P22            | Ofatumumab + bendamustine (1st line)                                                                              | 28 months                             |
| P23            | FCR Q-lite (1st line), FCR Q-lite (2nd line), RCD (3th line)                                                      | 12 months                             |
| P24            | FCR Q-lite (1st line)                                                                                             | 46 months                             |
| P25            | FC (1st line), RCD (2nd line), R-bendamustine (3th line)                                                          | 12 months                             |
| P26            | R-bendamustine (1st line)                                                                                         | 6 months                              |
| P27            | FCR (1st line), FCR (2nd line)                                                                                    | 16 months                             |
| P28            | FCR (1st line), FCR Q-lite (2nd line)                                                                             | 40 months                             |

Legend: fludarabin (F), cyclophosphamide (C), rituximab (R), dexamethasone (D), high-dose cytarabine and mitoxantrone (HAM)
